# Supplementary material for: DengueSeq: A pan-serotype whole genome amplicon sequencing protocol for dengue virus
Source: bioRxiv or medRxiv preprint supplement (doi:10.1101/2023.10.13.23296997), 2023-10-13

# Inputs

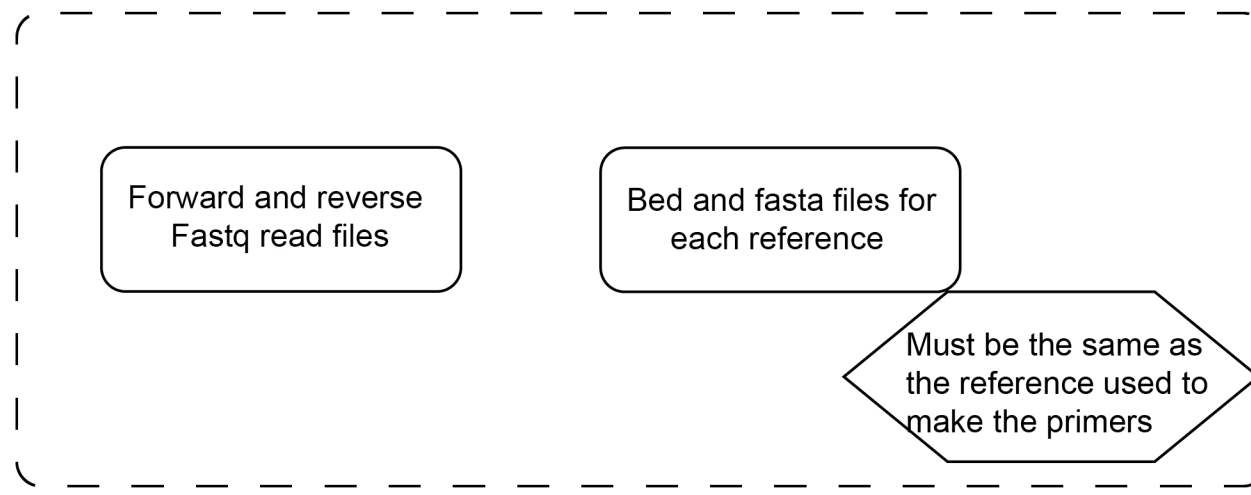

# Consensus generation

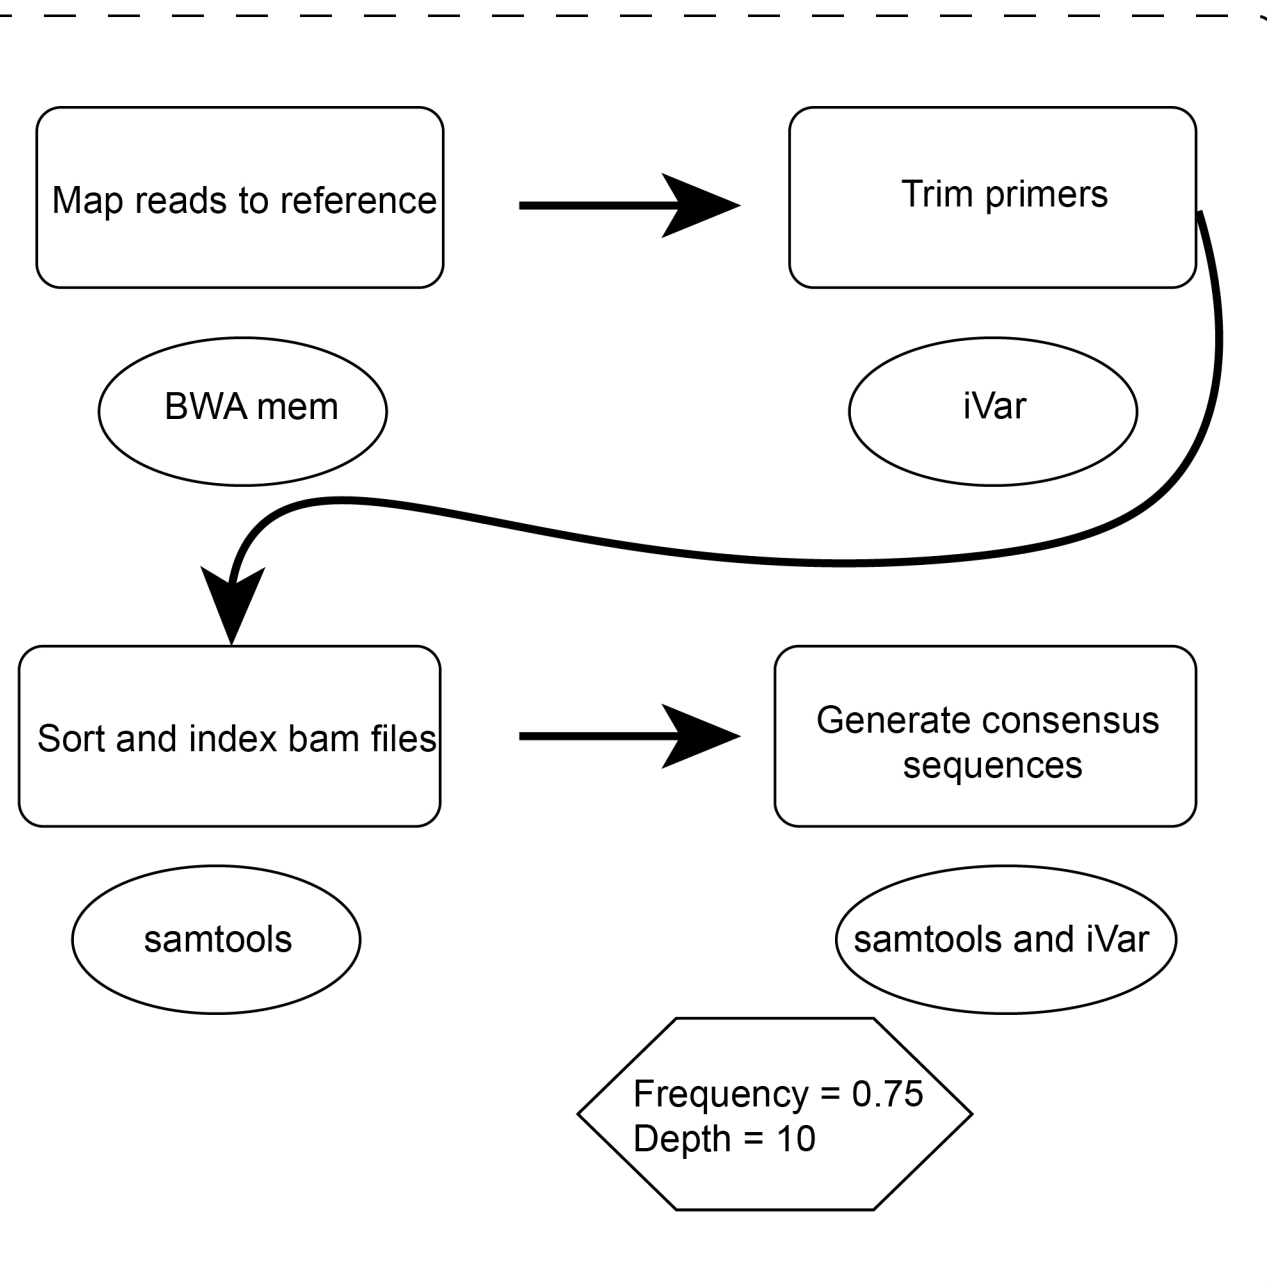

# Get virus calls

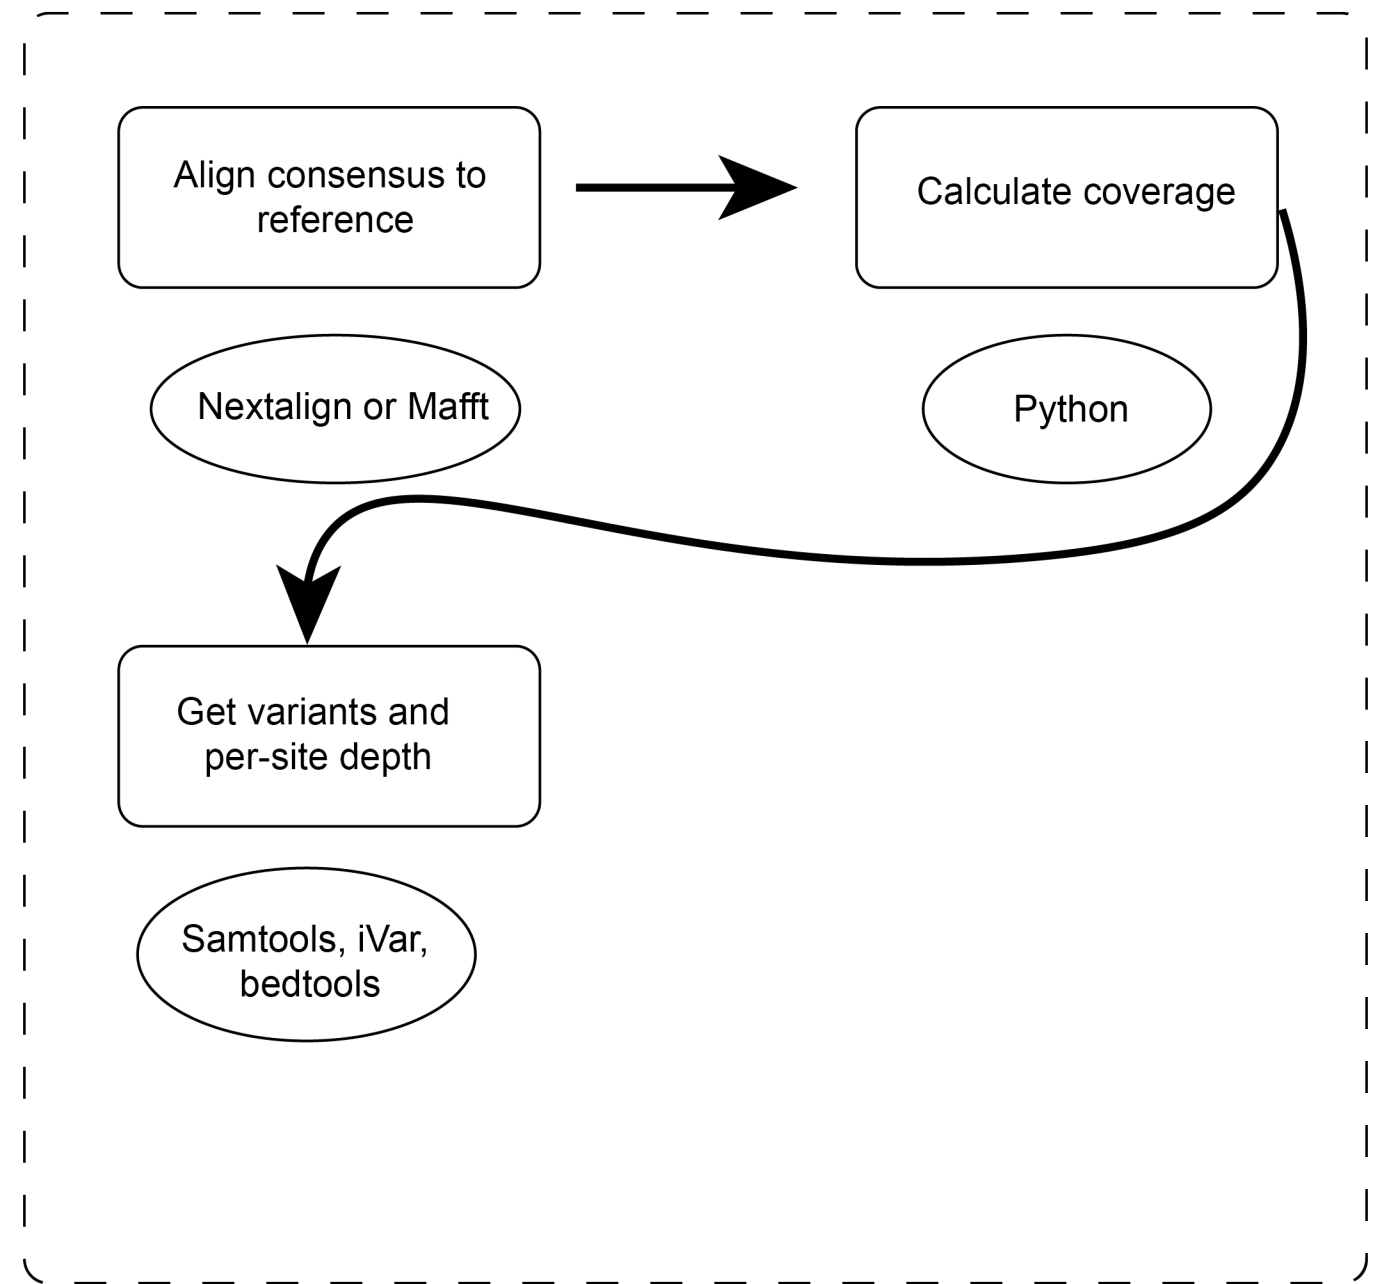

# Outputs

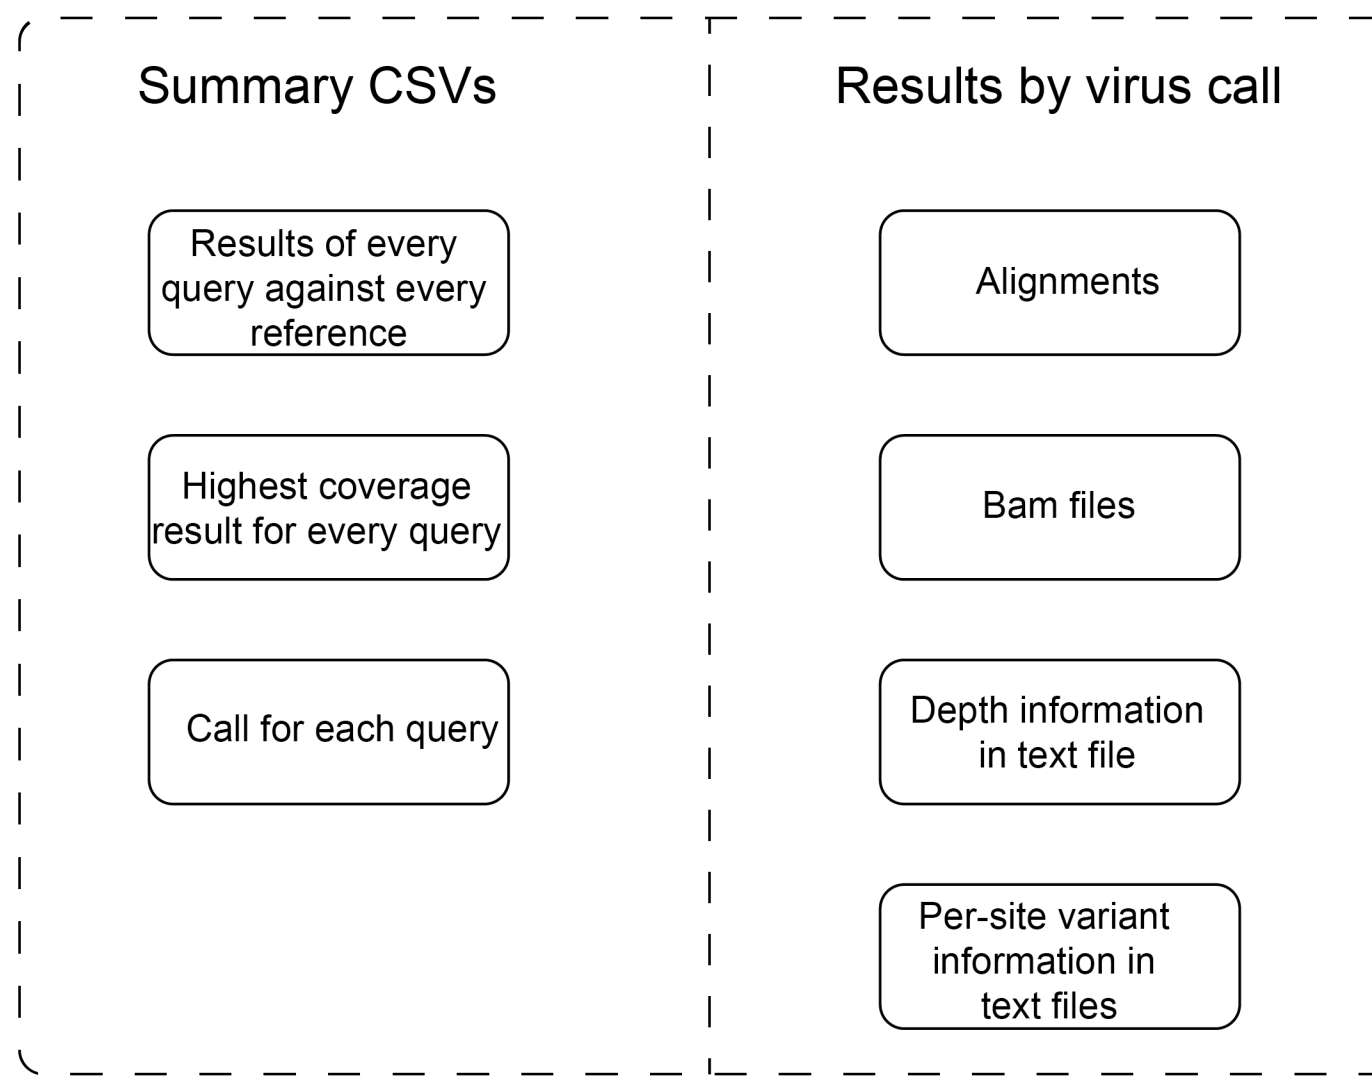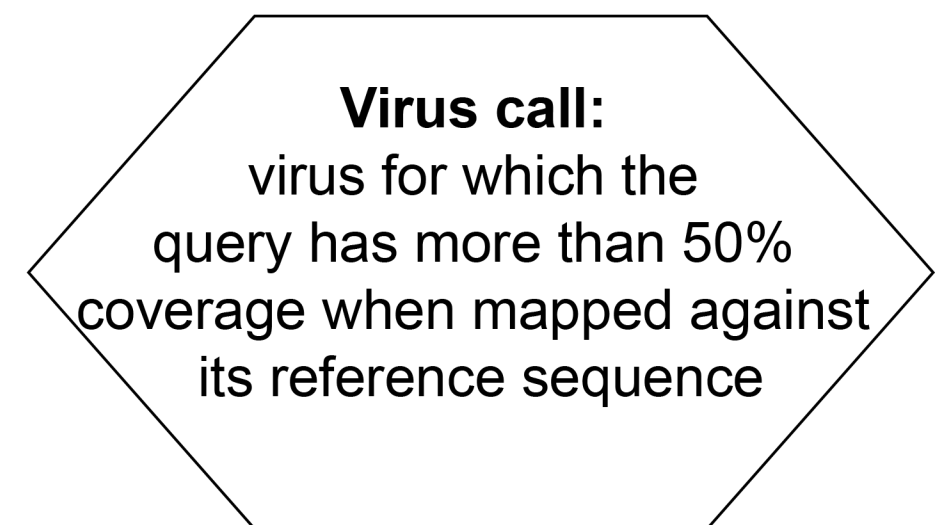

Supplement: Supplementary file [file media-1.pdf]
