# Supplementary material for: DengueSeq: A pan-serotype whole genome amplicon sequencing protocol for dengue virus
Source: bioRxiv or medRxiv preprint supplement (doi:10.1101/2023.10.13.23296997), 2023-10-13

# DENV2

Genome coverage at 20X (%)

100  
75  
50  
25  
0

Non-degenerate

Degenerate

Genotype

- 2\_I\_or\_related
- 2\_II\_or\_related
- 2\_III\_or\_related
- 2\_IV
- 2\_V
- 2\_VI
- 2\_unassigned

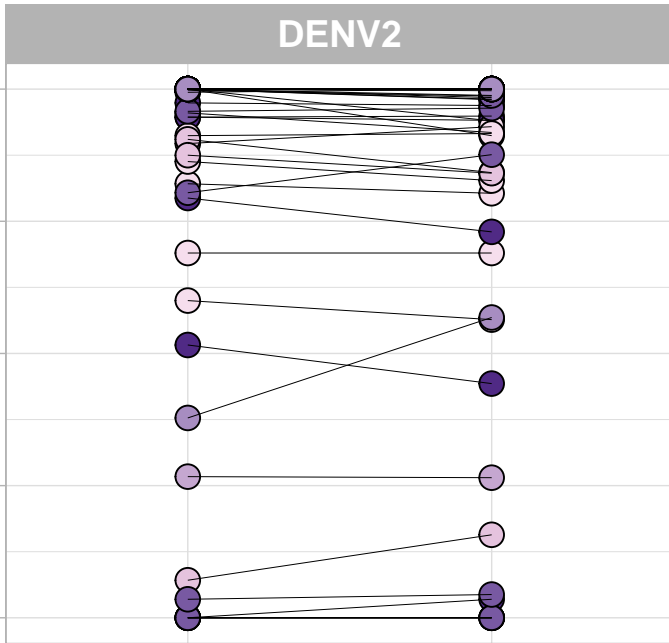

Supplement: Supplementary file [file media-2.pdf]
