# Supplementary material for: DengueSeq: A pan-serotype whole genome amplicon sequencing protocol for dengue virus
Source: bioRxiv or medRxiv preprint supplement (doi:10.1101/2023.10.13.23296997), 2023-10-13

### DENV1

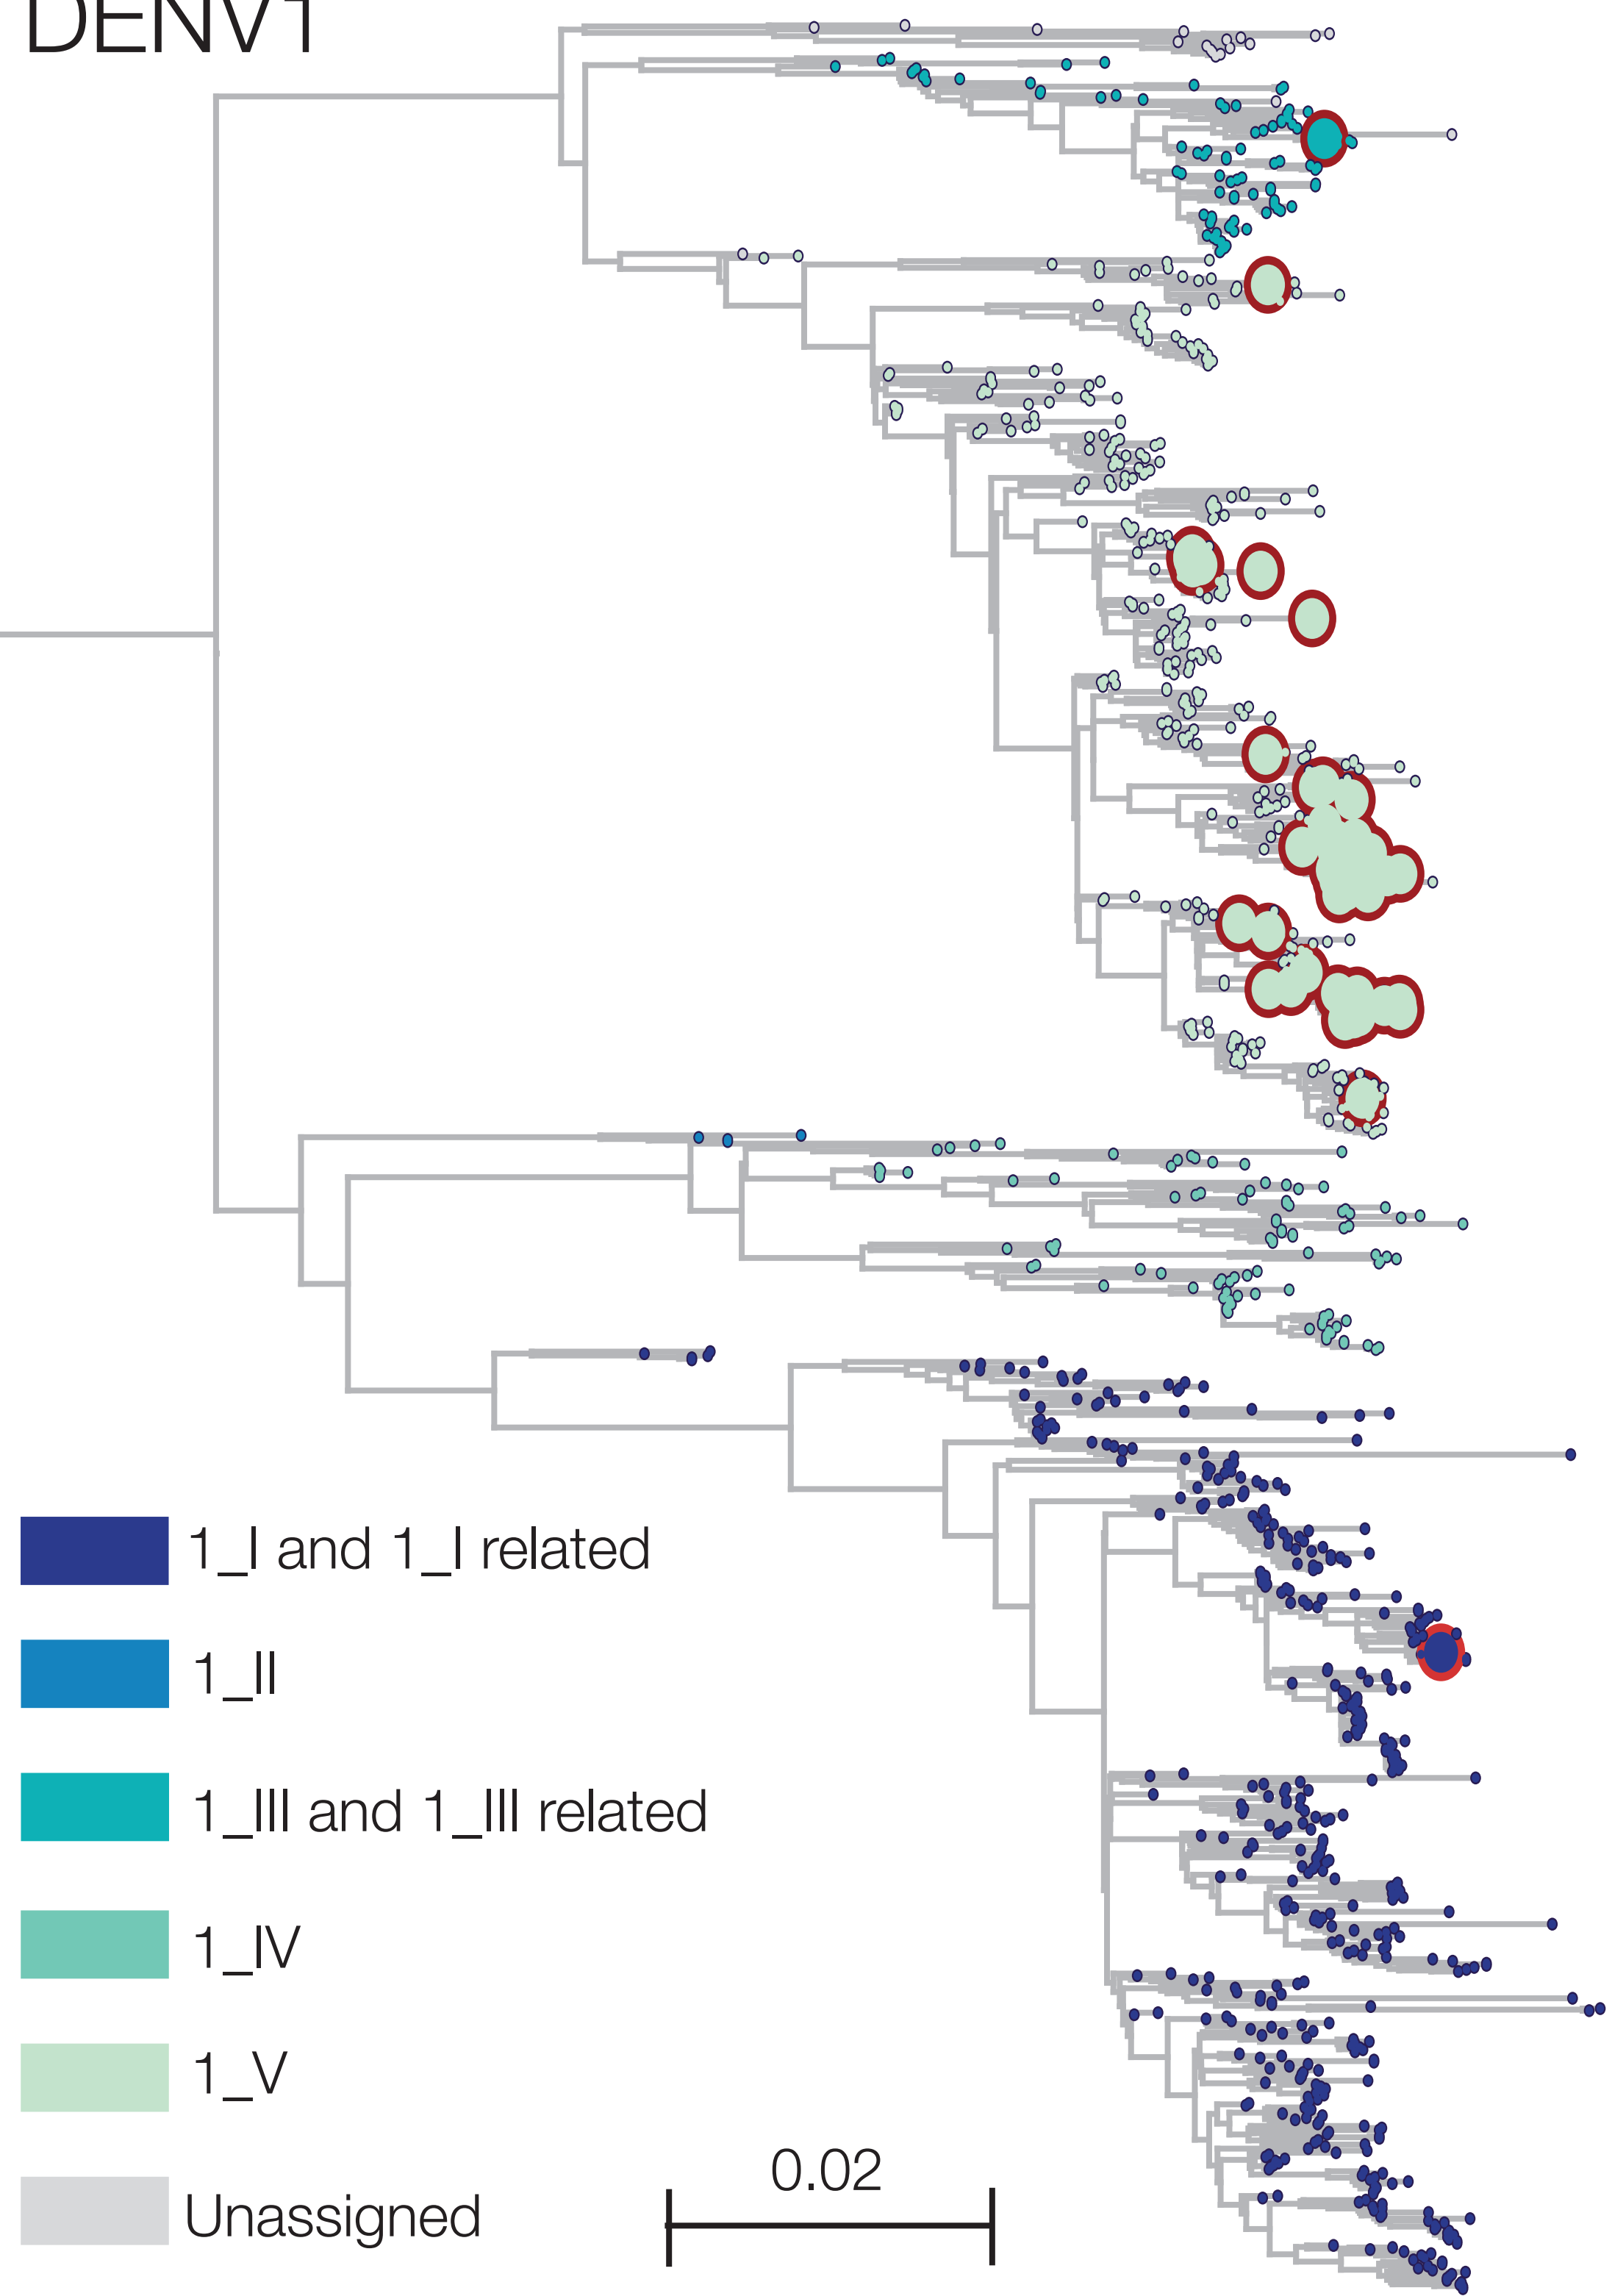

### DENV2

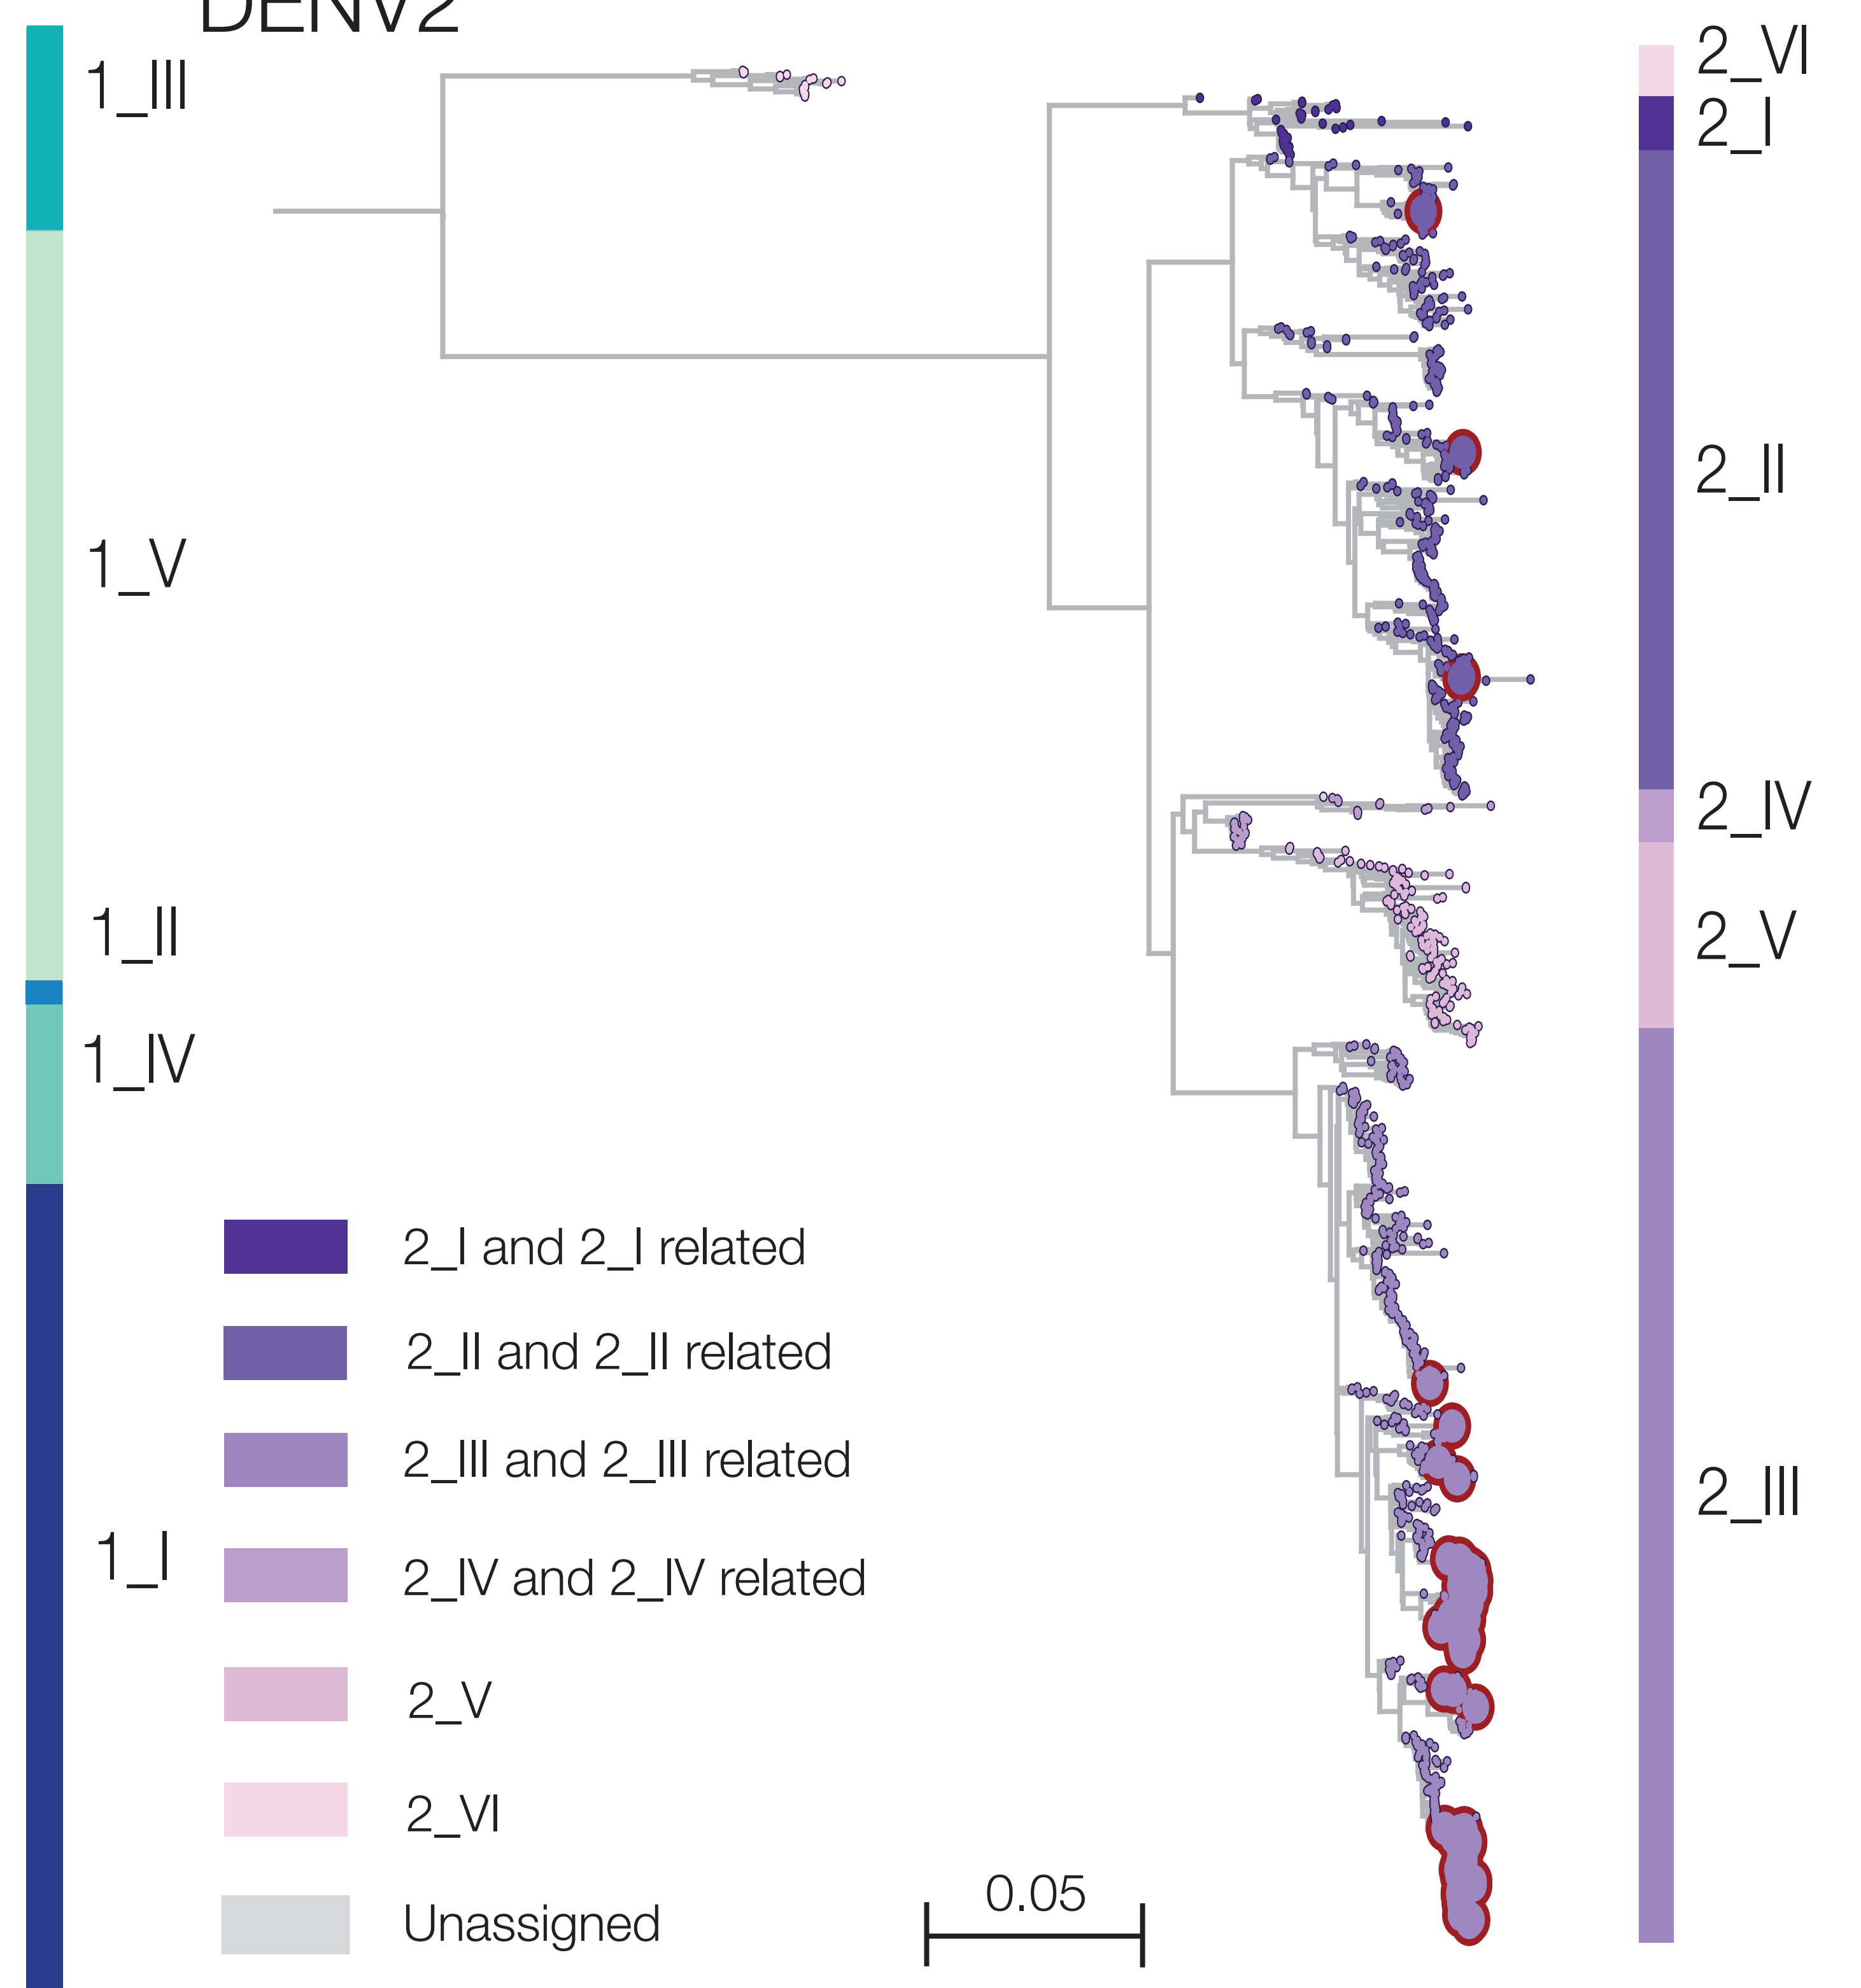

### DENV3

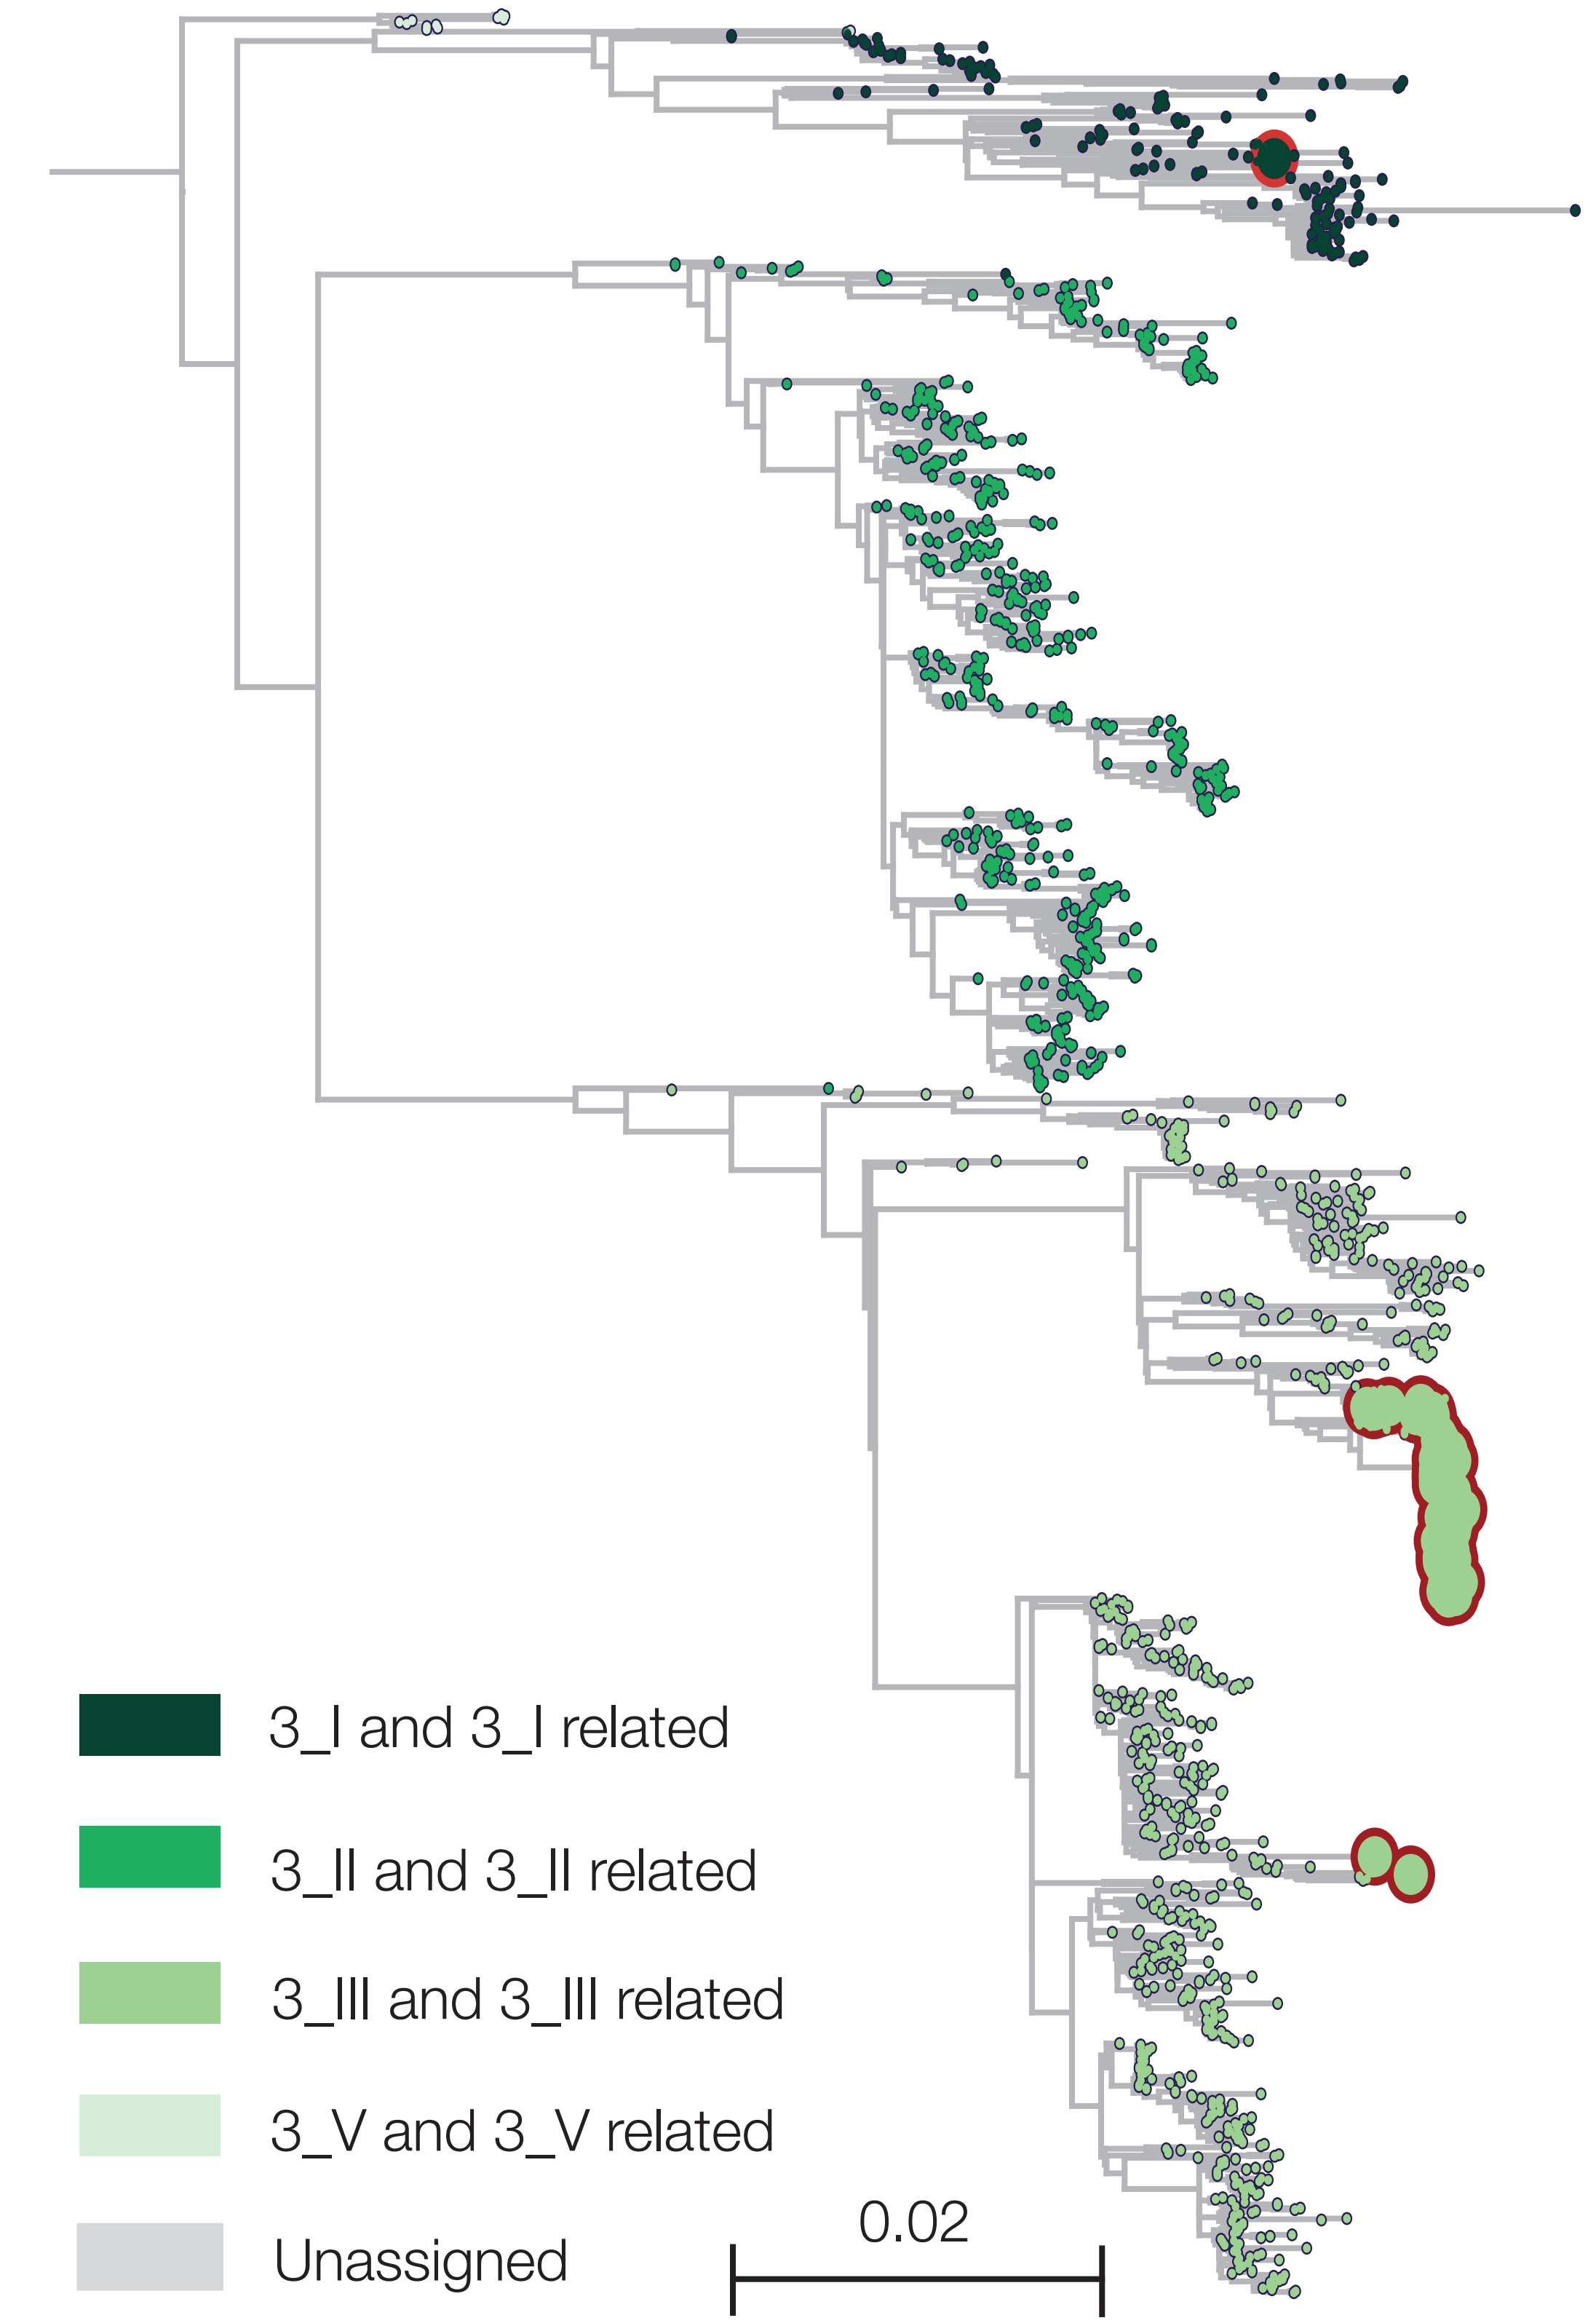

### DENV4

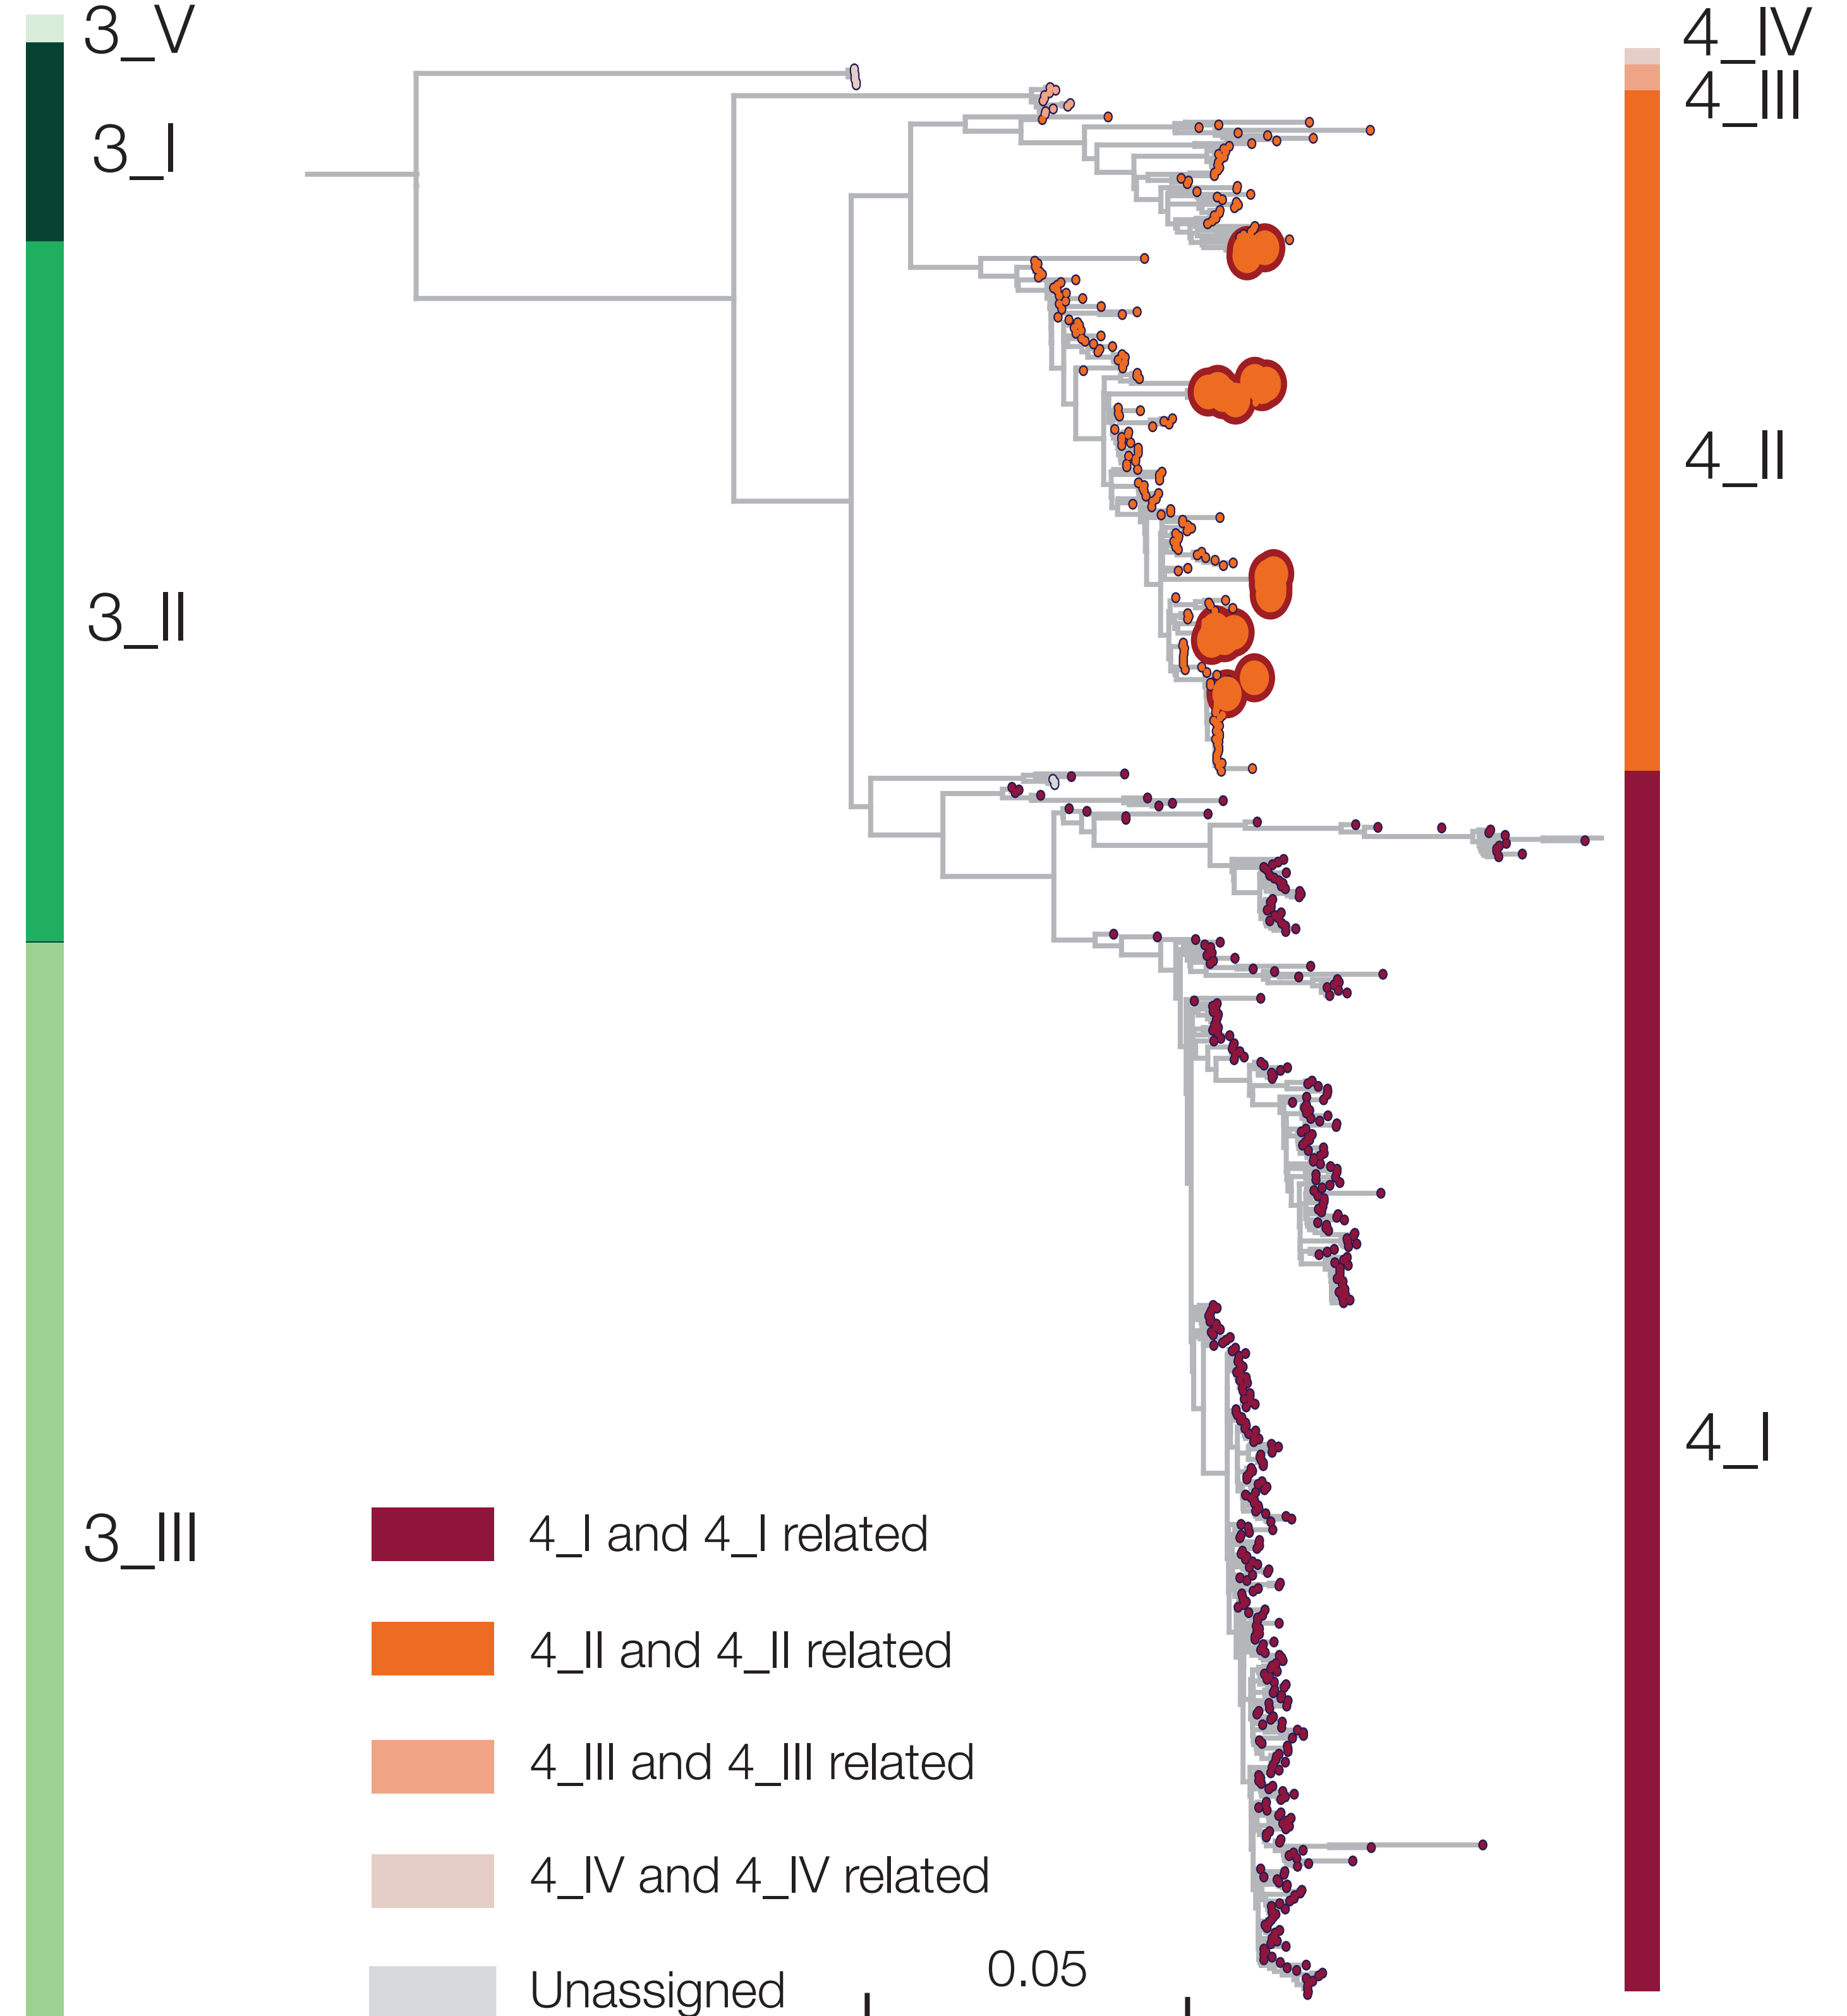

Supplement: Supplementary file [file media-4.pdf]
