# Supplementary material for: DengueSeq: A pan-serotype whole genome amplicon sequencing protocol for dengue virus
Source: bioRxiv or medRxiv preprint supplement (doi:10.1101/2023.10.13.23296997), 2023-10-13

**A****Virus stocks**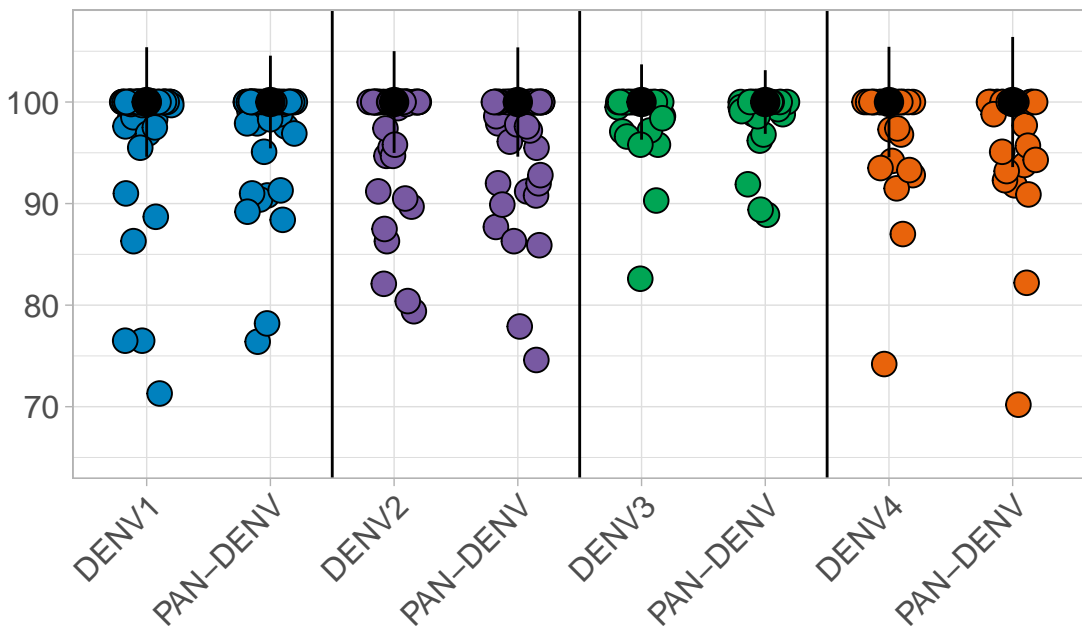**B****Clinical Samples**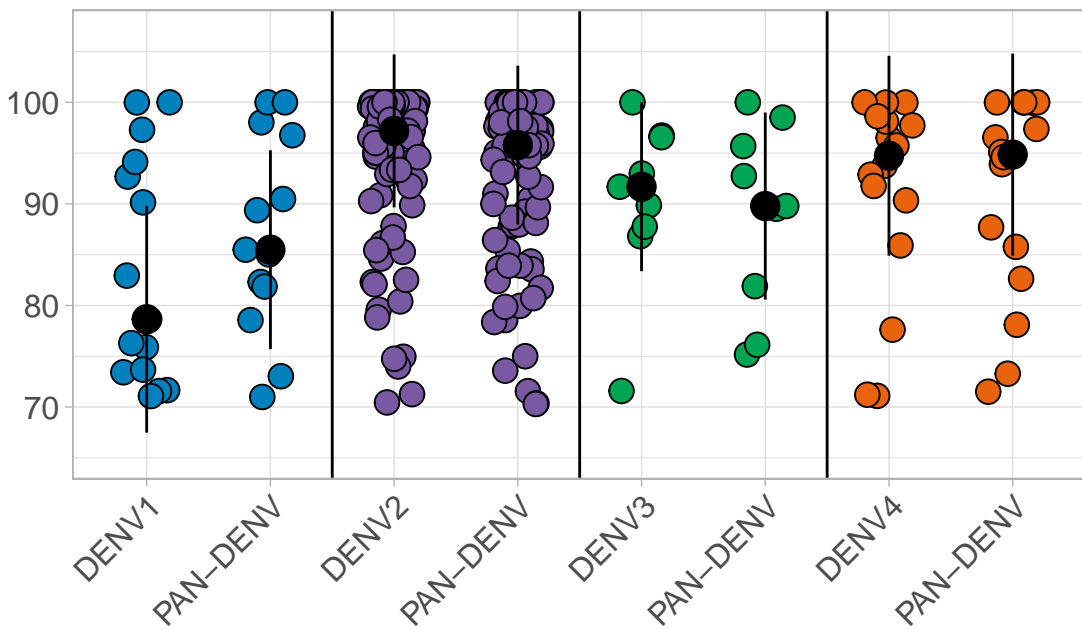

Supplement: Supplementary file [file media-5.pdf]
